# Supplementary material for: Systemic Treatment Selection for Patients with Advanced Pancreatic Neuroendocrine Tumours (PanNETs)
Source: MDPI journal article supplement (doi:10.3390/cancers12071988), 2020-07-21
Supplement: s1 [file s1]

# Supplementary Materials: Systemic treatment selection for patients with advanced pancreatic neuroendocrine tumours (PanNETs)

Vera G. Megdanova-Chipeva, Angela Lamarca, Alison Backen, Mairéad G. McNamara, Jorge Barriuso, Sonia Sergieva, Lilia Gocheva, Was Mansoor, Prakash Manoharan and Juan W Valle

**Table S1.** Summary of studies exploring the role of SSAs.

| Study                      | Design                                                                                                                                        | Treatment                       | Patient selection<br>(Grade,<br>Prior treatment,<br>ECOG PS)                                                                                    | N                                                       | Primary<br>End<br>Point                 | median PFS<br>(months)                                                                                                                                                  | median OS<br>(months)                                                                                                                                      | DoR<br>(months) | ORR<br>(%)               | DCR<br>(CR+PR+SD)<br>(%/n)                                                                                     | Grade3–4 toxicity (%)                                            |
|----------------------------|-----------------------------------------------------------------------------------------------------------------------------------------------|---------------------------------|-------------------------------------------------------------------------------------------------------------------------------------------------|---------------------------------------------------------|-----------------------------------------|-------------------------------------------------------------------------------------------------------------------------------------------------------------------------|------------------------------------------------------------------------------------------------------------------------------------------------------------|-----------------|--------------------------|----------------------------------------------------------------------------------------------------------------|------------------------------------------------------------------|
| PRO<br>MID<br>[21,16<br>5] | Phase IIIb Placebo-controlled, double-blind, prospective, randomised study<br><br>* Pts on placebo crossover after progression on active arm; | Octreotide LAR 30 mg vs Placebo | G1<br>Locally advanced or metastatic Midgut NET or with unknown origin, treatment naïve;<br><br>Karnofsky $\geq 80\%$ (86% of study population) | 85 pts<br>Octreotide 30 mg = 42 pts<br>Placebo = 43 pts | TTP                                     | Time to tumour progression:<br><br>Oct = 14.3 m<br>(95% CI, 11.0 to 28.8 m)<br>PI=6 m,<br>(95% CI, 3.7 to 9.4 m)<br>([HR] = 0.34; 95% CI, 0.20 to 0.59; $p = .000072$ ) | Oct 84.7 m<br>Placebo 83.7 m<br>[HR = 0.83 (95% CI: 0.47–1.46); $p = 0.51$ ]<br>*median OS from diagnosis – 106 m<br>5 y survival 67%<br>10-y survival 46% | NA              | 1% vs 1%                 | Oct 30 mg<br>CR = 0<br>PR = 1<br>SD = 28<br><br>Placebo<br>CR = 0<br>PR = 1<br>SD = 16                         | GI tract 6 vs 8<br>Haematological 5 vs 1<br>Fatigue/Fever 8 vs 2 |
| Jann, 2013 [59]            | Retrospective                                                                                                                                 | Octreotide LAR                  | G1-2, unknown<br>Advanced F or NF PanNET<br><br>ECOG PS- NS                                                                                     | 43 pts                                                  | ORR, DCR, ORR and DCR at 12 months, TTP | TTP – 13 m<br>*median TTP for Ki67 $>10\%$ compared with Ki67 $<5\%$ ( $p = 0.009$ ) and Ki67 5-10% ( $p = 0.036$ )                                                     | 98 m                                                                                                                                                       | NA              | 7%<br><br>ORR at 12 m 5% | 65%<br>PR 7% ( $n = 3$ )<br>SD 58% ( $n = 25$ )<br><br>DCR at 12 m<br>PR 5% ( $n = 2$ )<br>SD 37% ( $n = 16$ ) | NS                                                               |

Table S1. Cont.

|                                       |                                                                                                                                      |                                            |                                                                                                                                                                                                                                            |                                             |             |                                                                                                                    |                                           |    |                |                                                                                                                                                                                                     |                                        |
|---------------------------------------|--------------------------------------------------------------------------------------------------------------------------------------|--------------------------------------------|--------------------------------------------------------------------------------------------------------------------------------------------------------------------------------------------------------------------------------------------|---------------------------------------------|-------------|--------------------------------------------------------------------------------------------------------------------|-------------------------------------------|----|----------------|-----------------------------------------------------------------------------------------------------------------------------------------------------------------------------------------------------|----------------------------------------|
| CLARI<br>NET<br>[16,1<br>7,60,6<br>1] | Phase III randomised,<br>double-blind, placebo-<br>controlled, 96-week<br>study followed by an<br>open label extension<br>(OLE) part | Lanreotide<br>autogel 120 mg<br>vs Placebo | G1/2<br>(Ki-67 <= 10%)                                                                                                                                                                                                                     | 204 pts                                     | PFS         | Lan vs PL<br>Not reached vs 18.0<br>m<br>(95% CI 12.2–24.0).<br>HR 0.47 (95% CI<br>0.30–0.73);<br><i>p</i> < 0.001 |                                           |    |                | Core study[60]<br>Lan 66%<br>CR 0% ( <i>n</i> = 0)<br>PR 2% ( <i>n</i> = 2)<br>SD 64% ( <i>n</i> = 65)                                                                                              | Lan vs Pl<br>25 vs 31%                 |
|                                       |                                                                                                                                      |                                            | Locally advanced or metastatic,<br>non-functioning (except<br>gastrinomas) GEP-NETs, received<br>or not prior Tx, SSR +<br>*Baseline stable disease<br>96% in Lan vs 95% in Pl-arm<br>** Tx-naïve pts –<br>84 % in both arms<br>ECOG PS NS | PanNET =<br>91<br>Lan vs Pl<br>42 vs 49 pts |             | OLE<br>+ Safety                                                                                                    | Not<br>reported                           | NA | 2% vs<br>0%    |                                                                                                                                                                                                     |                                        |
|                                       | *Crossover of pts on<br>placebo after<br>progression on active<br>arm;                                                               |                                            |                                                                                                                                                                                                                                            | OLE = 88<br>pts<br>PanNET =<br>42           |             |                                                                                                                    |                                           |    |                | Core study<br>HR 0.58<br>(0.32–1.04)<br>Core study<br>30.8 m (95% CI:<br>30.0; 31.3).<br>Core/OLE study<br>38.5 m (95% CI:<br>30.9; 59.4]<br>PanNETs<br>(Core/OLE)<br>29.7 m [95%<br>CI:12.0; 38.5] |                                        |
| Cives,<br>2015[<br>62]                | Phase II open-label<br>study                                                                                                         | Parsireotide<br>LAR                        | G1-2                                                                                                                                                                                                                                       | 29 pts                                      | PFS         | 11 m                                                                                                               | NR<br>30-month -<br>70%<br>PanNET-<br>NS. | NS | 4%             | 64%<br>PR 4% ( <i>n</i> = 1)<br>SD 17% ( <i>n</i> = 60)<br>PanNETs - NS                                                                                                                             | All<br>Hyperglycaemia<br>Cholecystitis |
|                                       |                                                                                                                                      |                                            | Treatment-naïve patients with<br>metastatic NET<br>ECOG 0-1                                                                                                                                                                                | PanNET =<br>6 pts                           | PanNET - NS | PanNET - NS                                                                                                        |                                           |    | Pan<br>NETs-NS |                                                                                                                                                                                                     |                                        |

N—number median PFS—median progression free survival median OS—overall survival DoR—duration of response ORR—objective response rate DCR—disease control rate G—grade pts—patients TTP—time to tumour progression NET—neuroendocrine tumours Oct—octreotide LAR PI—placebo HR—hazard ratio CI—confidence interval CR—complete response PR—partial response SD—stable disease NA—not applicable GI—gastrointestinal NS—not stated Lan—Lanreotide autogel # Investigator assessment \*BICR (blinded independent central review) assessment / PanNET—pancreatic neuroendocrine tumours F-PanNET—functioning pancreatic neuroendocrine tumours NF-PanNET—non-functioning pancreatic neuroendocrine tumours OLE—open label extension GEP-NET—gastro-enteropancreatic neuroendocrine tumours.

Table S2. Summary of studies exploring the role of targeted therapies.

| Study             | Design                                                                                      | Treatment  | Pts Selection<br>(Grade,<br>Prior Tx,<br>ECOG PS) | N               | Primary<br>End<br>Point | Median PFS (Months)                           | Median OS<br>(Months)                            | DoR<br>(Months)                           | ORR<br>(%)                              | DCR<br>(CR+PR+SD)<br>(%/n)                               | G3-4 Toxicity<br>(%)                                                |
|-------------------|---------------------------------------------------------------------------------------------|------------|---------------------------------------------------|-----------------|-------------------------|-----------------------------------------------|--------------------------------------------------|-------------------------------------------|-----------------------------------------|----------------------------------------------------------|---------------------------------------------------------------------|
| RADIANT-1<br>[22] | Phase II<br>open-label, nonrandomised study,<br>stratified by<br>ongoing SSA at study entry | Everolimus | Well/Moderately<br>differentiated                 | 160 pts         | ORR<br>in the<br>group  | -SSA<br>& 9.7 m<br>(95% CI,<br>8.3 to 13.3 m) | - SSA<br>& 24.9 m<br>(95% CI,<br>20.2 to 27.1 m) | -SSA<br>& 10.6 m<br>(95% CI, 9.8<br>m-NA) | -SSA<br>& 9.6%<br>(95% CI<br>4.9-16.5%) | -SSA<br>& 77.4% / $n =$<br>89/<br>PR 9.6% / $n =$<br>11/ | - vs +SSA                                                           |
|                   |                                                                                             |            | Metastatic PanNETs<br>progressed on or after CHT  | N = 115<br>+SSA | without<br>SSA          | # 8.5 m                                       |                                                  |                                           |                                         |                                                          | Asthenia 5.2vs2.2%<br>>Glucose 4.3vs4.4%<br><Thrombocytes 2.6vs8.9% |

**Table S2. Cont.**

|                             |                                                                                        |                                                               |                                                                                                        |                                                  |                                      |                                                                                                   |                                                                                                      |          |                                     |                                                                                                                                                                                                                                                                                                                                  |                                                                                                        |                                                                                                     |
|-----------------------------|----------------------------------------------------------------------------------------|---------------------------------------------------------------|--------------------------------------------------------------------------------------------------------|--------------------------------------------------|--------------------------------------|---------------------------------------------------------------------------------------------------|------------------------------------------------------------------------------------------------------|----------|-------------------------------------|----------------------------------------------------------------------------------------------------------------------------------------------------------------------------------------------------------------------------------------------------------------------------------------------------------------------------------|--------------------------------------------------------------------------------------------------------|-----------------------------------------------------------------------------------------------------|
| Yao,<br>2008<br>[105]       | Pase II<br>study                                                                       | Everolim<br>us 5 or 10<br>mg +<br>Octreotid<br>e LAR 30<br>mg | G1/2<br>Metastatic or<br>unresectable<br>carcinoid or<br>pancreatic NET<br>ECOG PS NS                  | 60 pts<br>PanNE<br>T = 30                        | NS                                   | PanNET<br>50<br>weeks<br>(12.5 m)<br>(95% CI,<br>31 to 70<br>weeks)                               | Not<br>reached                                                                                       | NA       | 27%                                 | PanN<br>ET<br>PR =<br>27% ( <i>n</i><br>= 8),<br>SD =<br>60% ( <i>n</i><br>= 18)                                                                                                                                                                                                                                                 | hyperglycaemia<br>hypertriglyceridee<br>mia<br>hypophosphateemi<br>a<br>thrombocytopenia<br>leukopenia | 9%<br>3%<br>11%<br>3%<br>3%                                                                         |
| SUN111<br>[26,27]           | Ph III,<br>Double<br>blind<br>placebo-<br>controlled<br>trial in<br>advanced<br>PanNET | Sunitinib<br>vs<br>Placebo                                    | G1/2<br>Well differentiated<br>PanNETs;<br>No/1 or >=2 prior<br>Tx lines (121/50 pts);<br>ECOG PS 0–1  | 171 pts<br><br>Sun vs<br>PI<br>(86 vs<br>85 pts) | PF<br>S                              | Sun vs<br>PL<br>11.4 m<br>(7.4–<br>19.8)<br>Vs<br>5.5 m<br>(3.6–7.4<br>m) #<br>12.6 vs<br>5.8 m * | Sun vs<br>PL<br>38.6 m<br>vs 29.1<br>m (HR<br>0.73,<br>95% CI<br>0.50–<br>1.06, <i>p</i><br>=0.094)^ | NA       | 9%                                  | Sun<br>72% / <i>n</i><br>= 62/<br>(CR<br>2% / <i>n</i><br>= 2/<br>PR 7%<br>/ <i>n</i> = 6/<br>SD<br>63% / <i>n</i><br>= 54)<br>PI 60%<br>/ <i>n</i> =<br>51/<br>(CR<br>0% / <i>n</i><br>= 0/<br>PR 0%<br>/ <i>n</i> = 0/<br>SD<br>60% / <i>n</i><br>= 51/<br>71.3%<br>CR+P<br>R =<br>17.5%<br>SD<br>53.8%<br>( <i>n</i> =<br>43) | Neutropenia<br>Hypertension<br>Abdominal pain<br>Fatigue                                               | <u>Sun</u><br><u>vs</u><br><u>PI</u><br>12<br>vs<br>10<br>vs<br>1%<br>5 vs<br>10<br>%<br>5 vs<br>8% |
| Rinzivill<br>o 2018<br>[66] | Retrospecti<br>ve                                                                      | Sunitinib                                                     | G1-3 (G3-minority)<br>Progressive<br>panNETs<br>ECOG PS - NS                                           | 80 pts                                           | PF<br>S,<br>OS<br>an<br>d<br>DC<br>R | 10 m                                                                                              | NS                                                                                                   | NA       | 17.5                                |                                                                                                                                                                                                                                                                                                                                  | ALL                                                                                                    | 25.4<br>% -<br>G3<br>1.7<br>% -<br>G4                                                               |
| Sato,<br>2018<br>[67]       | Post-<br>marketing<br>study<br>(PMS)                                                   | Sunitinib                                                     | Well differentiated<br>(90.3%)<br>Other (9.7%)<br>Progressive<br>(unresectable,<br>locally advanced or | 61 pts                                           | OR<br>R                              | NS                                                                                                | NS                                                                                                   | 165 days | 13.7%<br>(95% CI,<br>5.7–<br>26.3%) | 70.6%<br>(95%<br>CI,<br>56.2–<br>82.5%)                                                                                                                                                                                                                                                                                          | ALL<br>Thrombocytopenia<br>Hypertension<br>Diarrhoea<br>Neutropenia<br>Leukopenia                      | 48.4<br>%<br>(30<br>pts)                                                                            |

[illegible]

Table S2. *Cont.*

|                              |                     |            |                                                 |                 |                                                                               |                              |                              |                     |                     |                     |                        |                     |
|------------------------------|---------------------|------------|-------------------------------------------------|-----------------|-------------------------------------------------------------------------------|------------------------------|------------------------------|---------------------|---------------------|---------------------|------------------------|---------------------|
| Panzuto, 2014<br>[71]        | Real-world<br>Study | Everolimus | G NS                                            | 1069 pts        | Tolerability and efficacy                                                     | 12 m (All)                   | 32 m (All)                   | NS                  | NS                  | NS                  | All                    | 46.1%               |
|                              |                     |            | Advanced progressive NETs                       | PanNET = 85 pts |                                                                               | PanNET similar to Non-PanNET | PanNET similar to Non-PanNET |                     |                     |                     | Pneumonitis            | 8.3%                |
|                              |                     |            | ECOG PS NS                                      |                 |                                                                               |                              | Thrombocytopenia             |                     |                     |                     | 7.7%                   |                     |
|                              |                     |            |                                                 |                 |                                                                               |                              |                              |                     |                     |                     | Anaemia                | 5.3%                |
|                              |                     |            |                                                 |                 |                                                                               |                              |                              |                     |                     |                     | Renal failure          | 3.5%                |
| The OBLIQUE<br>Study<br>[69] | Phase IV<br>trial   | Everolimus | G NS                                            | 48 pts          | Health-related quality of life (HRQoL) from baseline after 6 months treatment | 25.1 m (95% CI: 7.8–NR)      | NR During the study          | NA                  | NA                  | 55.6%               | 13 events:             |                     |
|                              |                     |            | advanced progressive PanNENs                    |                 |                                                                               |                              |                              |                     |                     |                     | • Mucosal inflammation |                     |
|                              |                     |            | ECOG PS 0–2 or not stated                       |                 |                                                                               |                              |                              |                     |                     |                     | • Diarrhoea            |                     |
|                              |                     |            |                                                 |                 |                                                                               |                              |                              |                     |                     |                     | • Fatigue              |                     |
|                              |                     |            |                                                 |                 |                                                                               |                              |                              |                     |                     |                     | • Stomatitis           |                     |
|                              |                     |            |                                                 |                 |                                                                               |                              |                              |                     |                     |                     | • Arthralgia           |                     |
|                              |                     |            |                                                 |                 |                                                                               |                              |                              |                     |                     |                     | • Pyrexia              |                     |
|                              |                     |            |                                                 |                 |                                                                               |                              |                              |                     |                     |                     | • Dry skin             |                     |
|                              |                     |            |                                                 |                 |                                                                               |                              |                              |                     |                     |                     |                        |                     |
| NCT02842749<br>[70]          | Phase IV<br>trial   | Everolimus | Well differentiated                             | 41 pts          | Safety and Efficacy                                                           | Waiting for results          | Waiting for results          | Waiting for results | Waiting for results | Waiting for results | Waiting for results    | Waiting for results |
|                              |                     |            | Adult Patients With Progressive PanNET in China |                 |                                                                               |                              |                              |                     |                     |                     |                        |                     |
|                              |                     |            | ECOG PS NS                                      |                 |                                                                               |                              |                              |                     |                     |                     |                        |                     |

**Table S2. Cont.**

|                         |                                        |              |                                                                                                         |                                                 |                                 |                                                                     |                                      |    |                                                                                                                                                 |                                                                       |                                                                    |                      |
|-------------------------|----------------------------------------|--------------|---------------------------------------------------------------------------------------------------------|-------------------------------------------------|---------------------------------|---------------------------------------------------------------------|--------------------------------------|----|-------------------------------------------------------------------------------------------------------------------------------------------------|-----------------------------------------------------------------------|--------------------------------------------------------------------|----------------------|
| NCT02267967<br>[75,166] | Phase Ib/II, single-arm study          | Surufatinib  | Grade 1/2<br>Unrespectable/ metastatic NET progressed on or not suitable for standard Tx<br>ECOG PS 0–1 | 81 pts<br>PanNETvsNonPan-NET<br>42 vs 39 pts ** | ORR, safety                     | PanNET group<br>21.2 m<br>(95% CI 15.9, 24.8)                       | Not reported                         | NA | PanNET<br>#91%<br>(PR 19% /n = 8/,<br>SD 71% /n = 30/,<br>NE~ 7% /n = 3/ )<br>*93 %<br>(PR 12% /n = 5/,<br>SD 81% /n = 34/,<br>NE~ 7% /n = 3/ ) | ALL<br><br>Hypertension<br>Proteinuria<br>Hyperuricaemia<br>Diarrhoea | 77.8%                                                              |                      |
|                         |                                        |              |                                                                                                         |                                                 |                                 | NonPan-NETgroup<br>13.4 m<br>(95% CI 7.6, 19.3)<br>All NET - 16.9 m |                                      |    | NonPan-NET<br>#15%<br>*10%<br><br>SD 82% /n = 32/,<br>NE~ 5% /n = 2/)                                                                           |                                                                       | 33 %<br>12 %<br>10 %<br>6%                                         |                      |
| NCT01466036<br>[73]     | Phase II, Two-cohort study             | Cabozantinib | Grade 1/2<br>Progressed pancreatic (CARC) or PanNET<br>ECOG PS 0–1                                      | 61 pts<br>PanNETs = 20 pts<br>CARC = 41 pts     | ORR                             | PanNET<br>21.8 m<br>(95% CI, 8.5–32.0 m)                            | NS                                   | NA | PanNET<br>15%,<br>(95% CI 5–36%)                                                                                                                | PanNET<br>PR n = 3<br>SD n = 15                                       | Hypertension<br>< Phosphate<br>> Lipase or<br>Amylase<br>Diarrhoea | 13%<br>11%<br>10%    |
|                         |                                        |              |                                                                                                         |                                                 |                                 | CARC<br>31.4 m<br>(95%, CI 8.5 m -NR)                               |                                      |    | CARC<br>ORR 15%<br>(95% CI 7–28%)                                                                                                               | CARC<br>PR n = 6<br>SD n = 26                                         | Lymphopenia<br>< Thrombocytes<br>Fatigue                           | 8%<br>7%<br>5%<br>5% |
| TALENT trial<br>[74]    | Phase II Prospective multicohort study | Lenvatinib   | G1/2<br>Progressed pancreatic or gastrointestinal NET (giNET)<br>ECOG PS NS                             | 111 pts:<br>PanNETs = 55 pts<br>giNETs = 56 pts | ORR by central radiology review | PanNET<br>15.5 m<br>(95% CI 11.3-NR)                                | PanNET<br>29.2 m<br>(95% CI 23.2-NR) | NA | PanNET<br>42.3%                                                                                                                                 | NS                                                                    | Hypertension<br>Fatigue<br>Diarrhoea                               | 22%<br>11%<br>11%    |

Table S2. Cont.

|                                 |                                                  |                                                     |                                                                                                                              |                                |     |                                   |                                            |                                                  |                      |                                                                                                                                                                                                |                                                                                                                                          |                                                                                                 |
|---------------------------------|--------------------------------------------------|-----------------------------------------------------|------------------------------------------------------------------------------------------------------------------------------|--------------------------------|-----|-----------------------------------|--------------------------------------------|--------------------------------------------------|----------------------|------------------------------------------------------------------------------------------------------------------------------------------------------------------------------------------------|------------------------------------------------------------------------------------------------------------------------------------------|-------------------------------------------------------------------------------------------------|
| SUNEVO<br>(GETNE 1408)<br>[107] | Phase II trial                                   | Evofofosamide + Sunitinib                           | G1/2<br>Unrespectable or metastatic pancreatic<br>NET naïve for systemic Tx, except SSA<br>ECOG PS 0–1                       | 17 pts                         | ORR | 10.3<br>(2.6–18.0)                | NA                                         | 18 m<br>(4.2–38.3)                               | 17.6%                | CR 5.9% ( <i>n</i> =<br>1)<br>PR –<br>confirmed<br>11.8% ( <i>n</i> = 2)<br>PR<br>unconfirmed<br>5.9% ( <i>n</i> = 1)<br>SD 64.7% ( <i>n</i> =<br>11)<br>Not evaluable<br>5.9% ( <i>n</i> = 1) | All<br>Neutropenia<br>Hypertension<br>ALT increase<br>Thrombocytopenia<br>Fatigue                                                        | 52.9%<br>18.8%<br>12.5%<br>12.5%<br>6.3%<br>6.3%                                                |
| PALBONET<br>[76]                | Phase II trial,<br>non-randomised,<br>open-label | Palbociclib                                         | G1/2<br>Metastatic PNET progressed on previos<br>Tx                                                                          | 21 pts                         | ORR | 1.9 m<br>(95% CI<br>0–13)         | 16.6 m<br>(95% CI<br>9.3–23.9)             | NA                                               | 0%                   | 55%<br>CR/PR – 0%<br>SD - 55% ( <i>n</i> =<br>11)                                                                                                                                              | Neutropenia<br>Trombocytopenia                                                                                                           | 5 pts<br>2 pts                                                                                  |
| Halperin, 2019<br>[77]          | Single-arm open-<br>label study                  | Ziv-Aflibercept                                     | G1-2<br>Metastatic or unable for surgery<br>PanNET,<br>MEN 1 included<br>ECOG PS 0–1                                         | 21 pts                         | ORR | NS                                | NS                                         | NA                                               | 9.5%<br>(2 pts)      | NS                                                                                                                                                                                             | Gastrointestinal<br>haemorrhage<br>Proteinuria                                                                                           | 1 pts (grade5)<br>5 pts, requiring study<br>discontinuation                                     |
| Bendell, 2016<br>[108]          | Phase II                                         | Bevacizumab<br>+Pertuzumab +<br>Octreotide LAR 30mg | G1-2<br>Unresectable or metastatic NET - typical<br>carcinoid or pancreatic islet cell, with<br>documented PD<br>ECOG PS 0–2 | 43 pts<br>PanNET =<br>11 pts   | RR  | PanNET<br>5.49<br>(1.1 to<br>6.5) | PanNET<br>26.4 [2]<br>(3.0 to NA)<br>\$    | NA                                               | PanNET<br>18%        | PanNET<br>91%                                                                                                                                                                                  | ALL<br>SAE:<br>- Nausea<br>- Vomiting<br>- abdominal pain<br>- acute kidney injury<br>- kidney infection<br>LVEF decline<br>Hypertension | 13.95%<br><br><br><br><br><br>9%<br>26%                                                         |
| Salazar, 2018<br>[64]           | Phase II open label,<br>randomised study         | BEZ235 or everolimus.                               | G1-2<br>Unresectable or metastatic PanNET,<br>prior systemic Tx </=2<br>ECOG PS 0–2                                          | 62 pts<br>BEZ = 31<br>EVE = 31 | PFS | BEZ =<br>8.2m<br>EVE =1<br>0.8m   | 6-m OS<br>BEZ =<br>96,6%<br>EVE =<br>90,3% | BEZ =<br>22.9<br>weeks<br>EVE =<br>39.4<br>weeks | Both<br>arms<br>9.7% | BEZ = 61.3%<br>CR = O<br>PR = 9,7%<br>SD = 51,6%<br>NE = 25,8%<br>EVE =9 0,3%<br>CR = O<br>PR = 9,7%<br>SD = 80,6%<br>NE = 6,5                                                                 | Diarrhoea<br>Hyperglycaemia<br>Asthenia<br>Stomatitis                                                                                    | BEZ vs EVE<br>83.9 vs 71.0%<br><br>16.1 vs 3.2%<br>16.1 vs 6.5%<br>16.1 vs 3.2%<br>12.9 vs 6.5% |

Table S2. Cont.



|                              |                                                          |                                                           |                                                                                                               |                                                   |                               |                                                                                                                                   |                                                                               |    |                                 |                                                                 |                                                                                   |                                                      |
|------------------------------|----------------------------------------------------------|-----------------------------------------------------------|---------------------------------------------------------------------------------------------------------------|---------------------------------------------------|-------------------------------|-----------------------------------------------------------------------------------------------------------------------------------|-------------------------------------------------------------------------------|----|---------------------------------|-----------------------------------------------------------------|-----------------------------------------------------------------------------------|------------------------------------------------------|
| Jin, 2016<br>[78]            | Phase II, single arm                                     | Panobinostat                                              | G1-2<br>Metastatic NET<br>ECOG PS 0–2                                                                         | 15 pts<br>PanNET<br>= 5pts                        | ORR                           | 9.9 m<br>(90% CI,<br>4.1–16.9)                                                                                                    | 47.3 m<br>(90% CI, 17.87<br>to not reached)                                   | NA | 0%                              | CR = O<br>PR = 0<br>SD = 47.3%                                  | Fatigue<br>Thrombocytopenia<br>Anorexia<br>Diarrhoea<br>Nausea                    | G3/4<br>27%<br>20%/17%<br>20%<br>13%<br>13%          |
| COOPERATE-2<br>trial<br>[63] | Phase II Randomised,<br>Open-label, Multicentre<br>Study | Everolimus + Pasireotide<br>LAR<br>Vs Everolimus Alone    | Advanced progressive PanNET, not<br>requiring somatostatin analog<br>treatment, prior Tx <= 2lines<br>ECOG PS | 160 pts<br>Pas/EVE =<br>79 pts<br>Eve = 81<br>pts | PFS                           | Pas/EVE<br>16.82 m<br>(12.09 to<br>19.58)<br>EVE<br>16.59<br>(11.07 to<br>19.48)<br>HR 0.99<br>(95%CI,<br>0.63-1.64)<br>p = 0.488 | 24 m OS<br>Pas/Eve<br>77.0<br>(65.6 to 85.1)<br>EVE<br>71.0<br>(59.3 to 79.9) | NA | PAS/EVE<br>20.3%<br>EVE<br>6.2% | PAS/EVE<br>= 77.2%<br>PR = 20.3%<br>EVE =<br>82.7%<br>PR = 6.2% | SAE all<br>Hyperglycaemia                                                         | Pas/Eve<br>vs<br>EVE<br>41 vs<br>49%<br>37 vs<br>11% |
| NCT01024387<br>[79]          | A phase II multicentre<br>two cohort study               | Ganitumab (AMG 479)                                       | Progressed on previous Tx carcinoid<br>or PanNETs<br>ECOG PS 0–2                                              | 60 pts<br>PanNET =<br>30<br>CARC = 30             | ORR                           | 6.3 m<br>(95% CI,<br>4.2–12.6)<br>PanNET<br>4.2                                                                                   | NR<br>at 12 m<br>66% (95% CI,<br>52–77%)<br>PanNET<br>65% (95% CI,<br>45–80%) | NA | No CR or<br>PR                  | PanNET<br>SD=31%                                                | ALL pts<br>Hyperglycaemia<br>Neutropenia<br>Thrombocytopenia<br>Infusion reaction | 4%<br>4%<br>4%<br>1%                                 |
| Phan, 2010<br>[18]           | Phase II                                                 | Pazopanib in<br>combination with SSAs<br>(octreotide LAR) | G – NS /Low grade/<br>Carcinoid or pancreatic NET<br>ECOG PS - NS                                             | 51 pts<br>PanNET =<br>29 pts                      | ResponseToxicity,<br>Survival | PanNET<br>11.7 m                                                                                                                  | NS                                                                            | NA | PanNET<br>17%                   | ALL 72.5%                                                       | Anaemia<br>Neutropenia<br>Fatigue<br>Hypertension<br>Diarrhoea                    | 1 pts<br>3 pts<br>3 pts<br>6 pts<br>3 pts            |

Table S2. Cont.

|                 |                                                         |           |                                                                |                                  |                                |                  |                                                                   |                                     |    |                                      |                     |                    |                |
|-----------------|---------------------------------------------------------|-----------|----------------------------------------------------------------|----------------------------------|--------------------------------|------------------|-------------------------------------------------------------------|-------------------------------------|----|--------------------------------------|---------------------|--------------------|----------------|
| PAZONET<br>[72] | Phase II, Open Label,<br>Uncontrolled Multicentre Trial | Pazopanib | G 1–3<br>Progressive<br>Advanced/Metastatic NET<br>ECOG PS 0–1 | 44 pts<br><br>PanNET =<br>18 pts | Clinical Benefit<br>Rate at 6m | PanNET<br>12.8 m | 24.1 m<br><br>For pts previously treated<br>with targeted therapy | ALL<br>11.3 m<br>(2.0 to<br>20.6 m) | NS | CR+PR+SD at 6 <sup>th</sup><br>month | For all pts<br>SAEs | 43.18%<br>(19 pts) |                |
|                 |                                                         |           |                                                                |                                  |                                |                  |                                                                   |                                     |    | 73.3% -previously<br>TKIs,           |                     |                    |                |
|                 |                                                         |           |                                                                |                                  |                                |                  |                                                                   |                                     |    | 66.7%<br>Tx naïve                    |                     |                    | Hepatotoxicity |
|                 |                                                         |           |                                                                |                                  |                                |                  |                                                                   |                                     |    | 60.0% previously<br>mTOR inhibitors  |                     |                    | Asthenia       |
|                 |                                                         |           |                                                                |                                  |                                |                  |                                                                   |                                     |    | 25% - previously TKIs<br>and mTOR    |                     |                    | Diarrhoea      |
|                 |                                                         |           |                                                                |                                  |                                |                  |                                                                   |                                     |    |                                      |                     |                    | Hypertension   |

N—number median PFS—median progression free survival median OS—overall survival DoR—duration of response ORR—objective response rate DCR—disease control rate CR—complete response PR—partial response SD—stable disease SSA—somatostatin analogues pts—patients & central review # Investigator assessment Pl—placebo HR—hazard ratio CI—confidence interval G—grade NS—not stated NA—not applicable Eve—everolimus CHT—chemotherapy PanNET—pancreatic neuroendocrine tumour Sun—sunitinib Tx—therapy CARC—carcinoid NR—not reached PAS—pasireotide SAE—serious adverse events.

Table S3. Summary of studies exploring the role of PRRT.

| Study                        | Design                                                                      | Treatment                                                              | Pts selection<br>(Grade,<br>Prior Therapy,<br>ECOG PS)                                                                   | N                               | Primary<br>End<br>Point          | median PFS<br>(months)                                                                                                                                                                                                        | median OS<br>(months)                               | DoR<br>(months) | ORR<br>(%)                                                                       | DCR<br>(CR+PR+SD)<br>(%/n)                                                                                                                                                                                                                      | G3-4 toxicity (%)                                                          |                                                                         |
|------------------------------|-----------------------------------------------------------------------------|------------------------------------------------------------------------|--------------------------------------------------------------------------------------------------------------------------|---------------------------------|----------------------------------|-------------------------------------------------------------------------------------------------------------------------------------------------------------------------------------------------------------------------------|-----------------------------------------------------|-----------------|----------------------------------------------------------------------------------|-------------------------------------------------------------------------------------------------------------------------------------------------------------------------------------------------------------------------------------------------|----------------------------------------------------------------------------|-------------------------------------------------------------------------|
| NETTER 1<br>[36,81,109]      | Phase III open-lable,<br>randomised,<br>international, multicentre<br>trial | 177Lu-Dotatate +<br>Octreotide LAR 30<br>mg vs Octreotide<br>LAR 60 mg | G1/2<br><br>Metastatic midgut NET<br>(excluding PanNETs),<br>progressed on SSA;<br>SSR +<br><br>Karnovski >=60           | 229 pts                         | PFS                              | Lu vs control<br>Low (LTB)<br>28.35 vs 11.04 (HR<br>= 0.218, 95% CI<br>0.120-0.394)<br>Moderate LTB<br>NR vs 8.67 (HR =<br>0.202, 95% CI<br>0.077-0.525);<br>High LTB<br>19.38 vs 5.52 (HR<br>= 0.193, 95% CI<br>0.079-0.474) | NR vs 27.4 m<br>HR 0.398<br>(95%, 0.207 –<br>0.766) | NA              | Lu<br>18% (95%<br>CI 10–25%)<br><br>Control<br>3% (95% CI<br>0–6%)<br><br><0.001 | Lu<br>CR 1% ( <i>n</i> = 1)<br>PR 17% ( <i>n</i> =<br>17)<br>SD NS<br><br>Control<br>CR 0% ( <i>n</i> = 0)<br>PR 3% ( <i>n</i> = 3)<br>SD NS                                                                                                    | Neutropenia<br>Thrombocytopenia<br>Lymphopenia<br>Nausea<br>Abdominal pain | Lu vs<br>control<br>1 vs 0%<br>2 vs 0%<br>9 vs 0%<br>7 vs 1%<br>3 vs 5% |
| T.Brabander,<br>2017<br>[37] | Retrospective study                                                         | 177Lu-DOTATATE                                                         | Mainly G1–2<br><br>Pts with bronchial or<br>GEP NET, SSR+ treated<br>with >=600miCi<br>Before 2013<br><br>Karnovski >=50 | 443 pts<br><br>PanNET = 133 pts | Safety,<br>Efficacy,<br>Survival | 29 m<br>(95% CI,<br>26–33 m)<br><br>PanNET 30 m                                                                                                                                                                               | 63 m<br>(95% CI,<br>55–72 m)<br><br>PanNET 71 m     | NA              | ALL 39%<br><br>PanNET<br>54% ( <i>n</i> =<br>72)                                 | ALL<br>CR 2% ( <i>n</i> = 9)<br>PR 37% ( <i>n</i> =<br>165)<br>SD 43% ( <i>n</i> =<br>192)<br>NE 5% ( <i>n</i> =<br>24)<br>PanNET<br>CR 5% ( <i>n</i> = 6)<br>PR 50% ( <i>n</i> =<br>60)<br>SD 30% ( <i>n</i> =<br>40)<br>NE 3% ( <i>n</i> = 4) | Leukaemia<br>Myelodysplastic<br>syndrome                                   | 0.7%<br>1.5%                                                            |

Table S3. Cont.

|                              |                                 |                                                                                            |                                                                                                                  |                                        |             |                                                                                                                                             |                                                                                                                     |    |                      |                                                                                                        |                                                                                                                  |
|------------------------------|---------------------------------|--------------------------------------------------------------------------------------------|------------------------------------------------------------------------------------------------------------------|----------------------------------------|-------------|---------------------------------------------------------------------------------------------------------------------------------------------|---------------------------------------------------------------------------------------------------------------------|----|----------------------|--------------------------------------------------------------------------------------------------------|------------------------------------------------------------------------------------------------------------------|
| Garske-Román,U, 2018 [38,43] | Prospective observational study | 177Lu-DOTATATE applying systematic, individualised dosimetry of the kidney and bone marrow | G1-3 / unknown<br>Metastatic NET, progressing on or not suitable for standard Tx, SSTR+<br>ECOG PS NS            | 200 pts<br>Duodenal or PanNET = 49 pts | NS          | PanNETs 27 m (95% CI 17-33 m)<br>ALL<br>Pts with CR/PR 31 m, (95% CI 23-35 m),<br>In pts with SD 28 m, (95% CI 21-31 m),<br>Not significant | PanNETs 42 (31-NR)<br>Pts with CR/PR 60 m, (95% CI 43 m- NR)<br>In pts with SD 42 m, (95% CI 34-52 m),<br>p = 0.004 | NA | PanNETs 45% (n = 22) | PanNET =94% (n = 46)<br>CR 2% (n = 1)<br>PR 43% (n = 21)<br>SD 49% (n = 24)                            | acute leukaemia 1.5%<br>chronic leukaemia 0.5%<br>marrow toxicity 15%<br>kidney toxicity- 0.5                    |
| Sansovini, 2017 [39,43]      | Phase II study                  | 177Lu-DOTATE Full Activity (FA) vs Reduced Activity (RA)                                   | G1/2<br>Unresectable/ metastatic PanNET, progressed on prior Tx, SSR+<br>ECOG PS NS                              | 60 pts<br>FA = 28 pts<br>RA = 32 pts   | NS          | All = 29 m (20-54 m)<br>FA= 53.4 m<br>RA =21.7 m<br>p =0.353                                                                                | All=Not reached<br>FA = Not Reached<br>RA = 63.8 m<br>p = 0.007                                                     | NA | 30% (n = 30)         | All = 82% (n = 49)<br>CR 7% (n = 4)<br>PR 23% (n = 14)<br>SD 52% (n = 31)<br>FA = 85.7 %<br>RA = 78,1% | FA<br>Anemia<br>Leukopenia<br>Thrombocytopenia<br>RA<br>Anemia<br>Leukopenia<br>Thrombocytopenia<br>*from Ramage |
| Dumont, 2015 [40,43]         | Phase II study                  | 90Y-DOTATOC vs. 90Y-DOTATOC plus 177Lu-DOTATOC                                             | G NS<br>Metastatic gastrinomas with baseline PD<br>ECOG PS NS                                                    | 36 pts<br>Y = 30 pts<br>Y= Lu = 6 pts  | Survival    | NS                                                                                                                                          | 40.1 m                                                                                                              | NA | 33,3% (n = 12)       | NS                                                                                                     | Heamatological Toxicity 2.8%<br>Renal toxicity 5,6%                                                              |
| Bertani, 2016 [41,43]        | Prospective trial               | 90Y-DOTATOC or 177Lu-DOTATOC or both +/- initial primary tumour resection (PTR)            | G1/2<br>PanNET with unresectable liver mets, not suitable for radical surgery, without previous Tx<br>ECOG PS NS | Total = 94 pts<br>Evaluable = 90 pts   | RR, OS, PFS | PAnNET 36 (24-44)<br>With vs without PTR 70 vs. 30 m<br>p = .002                                                                            | PanNET 76 (64-104 m)<br>With vs Without PTR<br>112 vs. 65m<br>p = .011                                              | NA | 26% (n = 23)         | All = 68% (n = 61)<br>CR 0%<br>PR 26% (n = 23)<br>SD 42% (n = 38)                                      | Not sated                                                                                                        |

Table S3. Cont.

|                              |                                         |                                      |                                                                                                               |                                                                                                                                      |                                                                    |                       |                                                                                                          |    |                                                                                                                                                                                                                                     |                                                                                                     |                                                                            |                                    |
|------------------------------|-----------------------------------------|--------------------------------------|---------------------------------------------------------------------------------------------------------------|--------------------------------------------------------------------------------------------------------------------------------------|--------------------------------------------------------------------|-----------------------|----------------------------------------------------------------------------------------------------------|----|-------------------------------------------------------------------------------------------------------------------------------------------------------------------------------------------------------------------------------------|-----------------------------------------------------------------------------------------------------|----------------------------------------------------------------------------|------------------------------------|
| Imhof, 2011<br>[43,167]      | Phase II single-center open-label trial | 90Y-DOTATOC                          | G-NS<br>Metastatic NEN, with PD on baseline CT<br>ECOG PS NS                                                  | 1109 pts<br>PanNET = 342 pts<br>NF PanNET = 295<br>Gastrinoma = 25<br>Insulinoma = 8<br>Glucagonoma = 8<br>VIPoma = 4<br>ACTHoma = 2 | OS,<br>renal toxicity<br>grade 4–5 Tx response.                    | NS                    | NF PanNET = 60 m<br>Gastrinoma = 32<br>Insulinoma = 17<br>Glucagonoma = 39<br>VIPoma = 40<br>ACTHoma = 5 | NA | PanNET 47% ( <i>n</i> = 161)<br>NF PanNET 49% ( <i>n</i> = 145)<br>Gastrinoma 20% ( <i>n</i> = 5)<br>Insulinoma 38% ( <i>n</i> = 3)<br>Glucagonoma 50% ( <i>n</i> = 4)<br>VIPoma 75% ( <i>n</i> = 3)<br>ACTHoma 50% ( <i>n</i> = 1) | CR -<br>NF PanNET 0.7% ( <i>n</i> = 2)<br>Gastrinomas 12% ( <i>n</i> = 3)<br>Others - Not specified | All pts<br>Haematological toxicity<br>Renal impairment                     | 12.8%<br>9.2%                      |
| Rogowski, 2016<br>[43,44]    | Phase II study                          | 90Y-DOTATATE                         | G1/2<br>Pancreatic and small bowel tumours, SSRT+, baseline PD or biochemical/clinical symptoms<br>ECOG PS NS | 67 pts<br>PanNET = 30 pts                                                                                                            | OS                                                                 | PanNET 25 m (21–33 m) | PanNET 42 m (34–48 m)                                                                                    | NA | PanNET 39% ( <i>n</i> = 12)                                                                                                                                                                                                         | PanNET - NS<br>CR 0%<br>PR 39% ( <i>n</i> = 12)<br>SD NS                                            | NS                                                                         |                                    |
| Hamiditabar, 2017<br>[43,45] | Expanded access trial                   | 177Lu-DOTATOC                        | G NS<br>NET with baseline PD, SSRT+<br>ECOG PS NS                                                             | 132 pts<br>PanNET = 48 pts                                                                                                           | Response – PFS, OS, radiologic, biochemical, and clinical response | NS                    | NS                                                                                                       | NA | PanNET = 13% ( <i>n</i> = 6)                                                                                                                                                                                                        | PanNET = 50% ( <i>n</i> = 24)<br>CR 0%<br>PR 13% ( <i>n</i> = 6)<br>SD 38% ( <i>n</i> = 18)         | ALL<br>Haematological toxicity<br>Hepatotoxicity                           | N = 16<br>N = 3                    |
| Horsch, 2016<br>[43,45]      | Retrospective                           | 90Y-DOTATOC or 177Lu-DOTATOC or both | Most of pts G1/G2<br>Advanced or metastatic NEN with baseline PD, SSRT+<br>ECOG PS OA                         | 445 pts<br>PanNET = 172 pts                                                                                                          | PFS, OS,<br>Side effects                                           | PanNET 39 m (29–49 m) | PanNET 53 m (37–69 m)                                                                                    | NA | NS                                                                                                                                                                                                                                  | ALL<br>CR 5.6%<br>PR 22.4%<br>SD 47.3%                                                              | ALL<br>bone marrow and kidney toxicity                                     | 0.2–1.5%                           |
| Baum, 2018<br>[43,46]        | Retrospective                           | 90Y-DOTATOC or 177Lu-DOTATOC or both | G1–3<br>NEN with baseline PD, SSRT+<br>ECOG PS NS                                                             | 1,048 pts<br>PanNET = 384 pts                                                                                                        | PFS, OS                                                            | PanNET 20 m (17–23 m) | PanNET 44 m (38–50 m)                                                                                    | NA | NS                                                                                                                                                                                                                                  | NS                                                                                                  | ALL<br>Leucopenia<br>Thrombocytopenia<br>Anaemia<br>Chronic kidney disease | N = 8<br>N = 9<br>N = 17<br>N = 14 |

Table S3. Cont.

|                                      |                          |                         |                                                                               |                                                                                                                                                          |    |                                                                                       |                                                                                             |                                                    |                                                                  |                                                                                                |                                                                                                             |                                                        |
|--------------------------------------|--------------------------|-------------------------|-------------------------------------------------------------------------------|----------------------------------------------------------------------------------------------------------------------------------------------------------|----|---------------------------------------------------------------------------------------|---------------------------------------------------------------------------------------------|----------------------------------------------------|------------------------------------------------------------------|------------------------------------------------------------------------------------------------|-------------------------------------------------------------------------------------------------------------|--------------------------------------------------------|
| Erasmus MC<br>Clinical Study<br>[82] | Phase I/II<br>single arm | 177Lu-<br>Oxodotreotide | G – NS<br>GEP-NET or<br>bronchial<br>carcinoid,<br>SSTR +<br>Karnofsky PS ≥50 | 1214 pts<br>Dutch=811<br>Non-Dutch=403<br>*The efficacy<br>analysis was<br>done only on<br>Dutch GEP-<br>NET=558 pts<br>Dutch PanNETs<br>197 pts (35.3%) | RR | Dutch PanNET=<br>30.5 m<br><br>Dutch PanNET pts<br>progressive at baseline=<br>35.6 m | Dutch PanNET=<br>70.8 m<br><br>Dutch<br>PanNETpts<br>progressive<br>at baseline =<br>80.7 m | Dutch<br>PanNET=<br>16.3 m<br>(95%CI<br>12.1–21.8) | Dutch<br>PanNET =<br>60.9% (n =<br>81)<br>(95% CI<br>52.1–69.2%) | Dutch PanNET<br>= 96.2%<br><br>CR 5.3% (n<br>=7)<br>PR 55.6% (n<br>=74)<br>SD 35.3% (n<br>=47) | Dutch GEP-NET<br>Leucopenia<br>Neutropenia<br>Lymphopenia<br>Thrombocytopenia<br>Anaemia<br>> GGTP<br>>ALAT | 2.4%<br>1.1%<br>29.6%<br>1.7%<br>1.1%<br>18.9%<br>2.8% |
|--------------------------------------|--------------------------|-------------------------|-------------------------------------------------------------------------------|----------------------------------------------------------------------------------------------------------------------------------------------------------|----|---------------------------------------------------------------------------------------|---------------------------------------------------------------------------------------------|----------------------------------------------------|------------------------------------------------------------------|------------------------------------------------------------------------------------------------|-------------------------------------------------------------------------------------------------------------|--------------------------------------------------------|

N—number median PFS—median progression free survival median OS—overall survival DoR—duration of response ORR —objective response rate DCR—disease control rate CR—complete response PR—partial response SD—stable disease G—grade SSA—somatostatin analogues pts—patients LTB—liver tumour burden NR—not reached NA—not applicable HR—hazard ratio CI—confidential interval Lu—Lutetium NS—not stated SSTR—somatostatin receptor FA—full activity RA—reduced activity Y—Yttrium PTR—primary tumour resection FA—functioning NEN—neuroendocrine neoplasms.

Table S4. Summary of studies exploring the role of chemotherapy.

| Study                                                                                                                                                                        | Design                                                       | Treatment                                                                                     | Pts selection<br>(Grade,<br>Prior Therapy,<br>ECOG PS)                                                                                                                       | N                                                        | Primary<br>End<br>Point                                                     | median PFS (months)                                                             | median OS<br>(months)                                                            | DoR<br>(months)                | ORR<br>(%)                              | DCR<br>(CR+PR+SD)<br>(%/n)                                                                    | G3-4 toxicity (%)                                                                                                                                                                                                  |
|------------------------------------------------------------------------------------------------------------------------------------------------------------------------------|--------------------------------------------------------------|-----------------------------------------------------------------------------------------------|------------------------------------------------------------------------------------------------------------------------------------------------------------------------------|----------------------------------------------------------|-----------------------------------------------------------------------------|---------------------------------------------------------------------------------|----------------------------------------------------------------------------------|--------------------------------|-----------------------------------------|-----------------------------------------------------------------------------------------------|--------------------------------------------------------------------------------------------------------------------------------------------------------------------------------------------------------------------|
| G1/2                                                                                                                                                                         |                                                              |                                                                                               |                                                                                                                                                                              |                                                          |                                                                             |                                                                                 |                                                                                  |                                |                                         |                                                                                               |                                                                                                                                                                                                                    |
| E2211 trial<br>[31]                                                                                                                                                          | phase II<br>two-arm,<br>randomised trial                     | Temozolomide(t) vs<br>Temozolomide and<br>capecitabine<br>(TemCap)                            | Metastatic or<br>unresectable<br>PanNETs,<br>progressed<br>within preceding<br>12 months, and<br>no prior T, C,<br>DTIC, or 5-FU                                             | 144 pts<br><br>T = 72 pts<br>TemCap = 72 pts             | PFS                                                                         | T = 14.4 m<br>TemCap = 22.7 m<br>(HR = 0.58,<br>$p = 0.023$ )                   | T = 38 m<br>TemCap = Not<br>reached<br>(HR = 0.41,<br>$p = 0.012$ )              | T = 9.7<br>m<br>TC =<br>12.1 m | NA                                      | T:<br>CR 2.8%<br>PR 25%<br>SD<br><br>TemCap:<br>CR 0%<br>PR 33.3%<br>SD                       | All<br>Neutropenia<br>Lymphopenia<br>Thrombocytopenia<br>Nausea<br>Vomiting<br>Diarrhoea<br>Fatigue<br><br>T vs TemCap<br>22 vs 44%<br>4 vs 13%<br>4 vs 5%<br>13 vs 8%<br>0 vs 8%<br>0 vs 8%<br>0 vs 8%<br>1 vs 8% |
| ECOG PS - NS                                                                                                                                                                 |                                                              |                                                                                               |                                                                                                                                                                              |                                                          |                                                                             |                                                                                 |                                                                                  |                                |                                         |                                                                                               |                                                                                                                                                                                                                    |
| De<br>Mestier,<br>2019<br>[32]                                                                                                                                               | Large multicenter<br>series,<br>Retrospective                | Temozolomide(T) vs<br>Temozolomide and<br>capecitabine<br>(TemCap)                            | G1-3<br>Locally advanced<br>or metastatic<br>PanNET,<br><br>ECOG PS 0–2                                                                                                      | 138 pts                                                  | PFS                                                                         | T = 21.4 m<br>TemCap = 19.8 m<br><br>HR 0.96, 95% CI<br>0.63–1.47, $p = 0.84$ ) | T = 47.6 m<br>TemCap = 75.2 m<br><br>(HR 0.66, 95% CI<br>0.37–1.19, $p = 0.16$ ) | NA                             | T vs TemCap<br>34.2% vs 51%             | T 73.7 :<br>CR 5.3%<br>PR 28.9%<br>SD 39.5%<br>Vs<br>TemCap 87%:<br>CR 2%<br>PR 49%<br>SD 36% | Nausea/Vomiting<br>Diarrhoea<br>Neutropenia<br>Thrombocytopenia<br>Asthenia<br>HFS<br><br>T vs TemCap<br>2.6 vs 2.1%<br>0 vs 2.1%<br>5.3 vs 6.4%<br>13.2vs12.8%<br>7.9 vs 0%<br>0 vs 2.3%                          |
| G1-2 or NEC<br>Metastatic NEN<br>(locally advanced<br>1 pts), with PD<br>before treatment<br>mainly (93 pts),<br>who had or no<br>previous Tx (75<br>vs 20%)<br>ECOG PS - NS |                                                              |                                                                                               |                                                                                                                                                                              |                                                          |                                                                             |                                                                                 |                                                                                  |                                |                                         |                                                                                               |                                                                                                                                                                                                                    |
| Campana,<br>2018<br>[33]                                                                                                                                                     | A multicenter,<br>international<br>retrospective<br>analysis | Temozolomide(T) or<br>Temozolomide and<br>capecitabine<br>(TemCap) in MGMT (+<br>vs MGMT (–)) | G1-2 or NEC<br>Metastatic NEN<br>(locally advanced<br>1 pts), with PD<br>before treatment<br>mainly (93 pts),<br>who had or no<br>previous Tx (75<br>vs 20%)<br>ECOG PS - NS | 95 pts<br>PanNET = 43 pts<br>T = 31.9%<br>TemCap = 68.1% | Correlat<br>ion<br>between<br>n OR<br>and<br>MGMT<br>promot<br>er<br>status | ALL – 10 m<br><br>PanNET= 13 m                                                  | ALL = 33 m<br><br>PanNET = 35 m                                                  | NA                             | MGMT +<br>51.8 %<br><br>MGMT –<br>17.7% | ALL<br>PR = 27.4%<br>SD = 44.1%                                                               | NS                                                                                                                                                                                                                 |

Table S4. Cont.

|                     |                                                            |                                                                          |                                                                          |                                                                       |                                                             |                                                        |                                                   |    |                                                   |                                            |                                                                                                                                                                      |            |
|---------------------|------------------------------------------------------------|--------------------------------------------------------------------------|--------------------------------------------------------------------------|-----------------------------------------------------------------------|-------------------------------------------------------------|--------------------------------------------------------|---------------------------------------------------|----|---------------------------------------------------|--------------------------------------------|----------------------------------------------------------------------------------------------------------------------------------------------------------------------|------------|
| Kunz, 2016 [91]     | 2 separate prospective phase II trials                     | FOLFOX + Bevacizumab (B) study and CAPOX/Bevacizumab (B) study           | G NS Advanced NET ECOG PS NS                                             | 76 pts FOLOFOX/B = 36 pts PanNET = 12 CAPOX/B = 40 pts PanNET = NS    | RR at 12 cycle (FOLFOX/B) PFS (CAPOX/B) and toxicity - both | FOLFOX/B PanNET = 21m CAPOX/B PanNET = NS ALL = 16.7 m | NS                                                | NA | FOLFOX/B PanNET = 41% CAPOX/B PanNET = NS All 18% | NS                                         | NS                                                                                                                                                                   |            |
| BETTER trial [28]   | Phase II trial open-label, non-randomised, two-group study | Bevacizumab + 5-FU and Streptozocin Minimum 6 cycles                     | G1-2 Progressive metastatic PanNET ECOG PS 0-1 (97%)                     | 34 pts                                                                | PFS                                                         | At 24 m: 23.7 m (95% CI: 13.1-NR)                      | At 24 m: 88%                                      | NA | 56%                                               | CR = 0 PR = 56% (n = 19) SD = 44% (n = 15) | Hypertension Abdominal pain Thromboembolic events                                                                                                                    | 21% 12% 9% |
| Chan, 2013 [94]     | Phase 1/2 prospective study                                | Temozolomide + Everolimus 5mg (cohort1) or 10mg (cohort2)                | G1-2 Metastatic or locally unresectable pancreatic NET ECOG PS 0-2       | 43 pts Cohort1 = 7 pts Cohort2 = 36 pts                               | RR                                                          | 15.4 m (95% CI, 9.4–20.4 m)                            | Not reached                                       | NA | 40%                                               | CR=0 PR = 40% (n =16) SR = 53% (n = 21)    | Lymphopenia Thrombocytopenia Pneumonitis                                                                                                                             | 44% 16% 0% |
| Dilz, 2015 [29]     | Retrospective                                              | STZ/5-FU                                                                 | G1-3 Advanced PanNET, Baseline progression was evident in 74% ECOG PS NS | 96 pts                                                                | ORR, TTP, OS                                                | NS                                                     | 54.8 m                                            | NA | 42.7%                                             | CR = NS PR = NS SD = 40.6%                 | NS                                                                                                                                                                   |            |
| Moertel, 1992 [30]  | Phase III                                                  | Chlorozotocin vs. Streptozotocin + 5-FU vs. Doxorubicin + Streptozotocin | G – NS Unresectable or metastatic islet-cell cancer ECOG PS 0-3          | 102 Chlorozotocin = 33 pts STZ/5-FU = 33 pts STZ/Doxorubicin = 36 pts | NS                                                          | CHL 17 m STZ/5-FU 14 m STZ/Doxo 18 m                   | Chl 18 m STZ/5-FU 16.8 m STZ/Doxo 26.4 m          | NA | Chl 30% STZ/5-FU 45% STZ/Doxo 69%                 | NS                                         | Chl vs STZ/5-FU vs STZ/Doxo Vomiting: 2 vs 41 vs 20 pts Leucopenia: 14 vs 25 vs 5 pts Thrombocytopenia: 6 vs 6 vs 0 pts Chronic renal insufficiency: 7 vs 7 vs 4 pts |            |
| Delaunoy, 2004 [85] | Retrospective                                              | Doxorubicin and Streptozotocin                                           | Well-differentiated pancreatic endocrine carcinomas ECOG PS NS           | 45 pts                                                                | NS                                                          | 16 m                                                   | 2-year survival rate 50.2% 3y survival rate 24.4% | NA | 36%                                               | 60%                                        | Neutropenia Vomiting                                                                                                                                                 | 24% 13%    |



Table S4. Cont.

|                       |               |                                      |                                                                                                                                   |                                 |                           |           |                        |               |              |                                             |                                                                     |                                                  |
|-----------------------|---------------|--------------------------------------|-----------------------------------------------------------------------------------------------------------------------------------|---------------------------------|---------------------------|-----------|------------------------|---------------|--------------|---------------------------------------------|---------------------------------------------------------------------|--------------------------------------------------|
| Kouvaraki, 2014 [86]  | Retrospective | Streptozotocin, Doxorubicin and 5-FU | G - NS<br>Locally advanced or metastatic NEC<br>ECOG PS - NS                                                                      | 84 pts                          | ORR, PFS, OS              | 18 m      | 37 m                   | Na            | 39%          | 89%<br>(PR = 39%<br>SD = 50%)               | All<br>Leucopenia<br>Thrombocytopenia<br>Fatigue<br>Mucositis       | 23%<br>10.7%<br>1.1%<br>4.7%<br>4.7%             |
| Turner, 2010 [87]     | Retrospective | 5-FU, Cisplatin and Streptozotocin   | G 1–3 (PanNETs G1/2 36, G3 9 pts)<br>Metastatic or locally advanced neuroendocrine tumours, chemo naive<br>ECOG PS 0–>=2          | 82 pts<br>PanNET = 49 pts       | NS                        | ALL 9.1 m | All 31.4 m             | NA            | PanNET = 38% | PanNET = 86%                                | For All pts<br>Nausea<br>Vomiting<br>Neutropenia                    | 12 pts<br>14 pts<br>23 pts                       |
| Ramanathan, 2001 [88] | Phase II      | Dacarbazine                          | G NS<br>Advanced pancreatic islet cell tumours, with progressive symptoms or evidence of rapidly advancing disease<br>ECOG PS 0–3 | 50 pts                          | RR, Safety, Survival, DoR | NS        | 19.3 m                 | 10 m (4–28 m) | 34%          | CR = 8%<br>PR = 26%<br>SD = NS<br>NE = 3.8% | All<br>Haematological<br>Vomiting                                   | 30%                                              |
| Kulke, 2006 [92]      | Phase II      | Temozolomide and Thalidomide         | G1-2 (1 pts with poorly diff. tumours)<br>Metastatic carcinoid, phaeochromocytoma, pancreatic NET<br>ECOG PS 0–1                  | 29 pts<br>PanNET = 11 pts (38%) | RR                        | NS        | All<br>2y survival 61% | ALL = 13.5 m  | PanNET 45%   | PanNET 93%                                  | In all pts<br>Lymphopenia<br>Neutropenia<br>Diarrhoea<br>Infections | 20 pts/69%<br>2 pts/6%<br>4 pts/14%<br>5 pts/17% |

Table S4. Cont.

|                       |               |                                           |                                                                                                                                                                    |                                                        |                        |                                                |                 |    |                                                |                                               |                                                                                                                                                                     |                                                                                          |
|-----------------------|---------------|-------------------------------------------|--------------------------------------------------------------------------------------------------------------------------------------------------------------------|--------------------------------------------------------|------------------------|------------------------------------------------|-----------------|----|------------------------------------------------|-----------------------------------------------|---------------------------------------------------------------------------------------------------------------------------------------------------------------------|------------------------------------------------------------------------------------------|
| Strosberg, 2011 [34]  | Retrospective | Temozolomide and Capecitabine             | G1–2<br>Pts with metastatic PanNETs who have not received systemic therapy<br>ECOG PS                                                                              | 30 pts                                                 | RR, Survival, Safety   | 18 m                                           | 2y-survival 92% | NA | 70%                                            | 97%<br>CR = 0<br>PR = 70%<br>SD = 27%         | All                                                                                                                                                                 | 14%                                                                                      |
| Chan, 2012 [93]       | Phase II      | Temozolomide and Bevacizumab              | G1–3<br>Metastatic or locally unresectable NETs<br>ECOG PS ≤2                                                                                                      | 35 pts<br>PanNET = 15 pts (44%)                        | RR                     | PanNET 14.3 m                                  | PanNET 41.7m    | NA | PanNET 33.3%                                   | PanNET 87%<br>CR = 0<br>PR = 15%<br>SD = 65%  | For all pts<br>Lymphopenia<br>thrombocytopenia                                                                                                                      | 53%<br>18%                                                                               |
| Venook, 2008 [89]     | Phase II      | 5-Fu, Oxaliplatin and Bevacizumab         | G1–2<br>Carcinoid tumours (CARC), pancreatic NET (PanNET), or platinum-refractory poorly differentiated NET with clinical or radiologic progression<br>ECOG PS 0–1 | 13 pts<br>PanNET = 6 pts                               | Efficacy and safety    | NS                                             | NS              | NA | 20%                                            | PanNET 100%<br>CR = 0<br>PR = 33%<br>SD = 67% | abdominal pain<br>anaemia<br>neutropenia<br>FN<br>fatigue<br>ascites<br>gastrointestinal haemorrhage<br>hypertension<br>thrombocytopenia<br>diarrhoea<br>neuropathy | 15.4%<br>15.3%<br>30.8%<br>7.6%<br>38.4%<br>7.6%<br>7.6%<br>23%<br>7.6%<br>7.6%<br>15.3% |
| Kunz, 2010 [90]       | Phase II      | Capecitabine, Oxaliplatin and Bevacizumab | G1–3<br>Metastatic or unresectable NET<br>ECOG PS - NS                                                                                                             | 40 pts<br>PanNET = 20 pts                              | PFS, toxicity          | ALL 13,7m                                      | NS              | NA | PanNET 30%                                     | ALL 94%                                       | NS                                                                                                                                                                  |                                                                                          |
| De Mestier, 2019 [35] | Retrospective | TemCap vs 5-FU/DTIC (dacarbazine)         | G1–3 (majority G1–2)<br>pancreatic or small-intestine advanced NET                                                                                                 | 247pts<br>94 - 5FU/DTIC 153 – TemCap<br>PanNET = 82.3% | Tolerance<br>RR<br>PFS | 5FU/DTIC 13.9 m<br>TemCap 18.3 m<br>$p = 0.86$ | NS              | NA | TemCap 38.3 m<br>5FU/DTIC 39.2%<br>$p = 0.596$ | NS                                            | TemCap = 24.7%<br>5FU-/DTIC = 8.5%                                                                                                                                  |                                                                                          |

N—number median PFS—median progression free survival median OS—overall survival DoR— duration of response ORR— objective response rate DCR—disease control rate CR—complete response PR—partial response SD—stable disease G—grade T—temozolomide TemCap—temozolomide and capecitabine pts—patients NA—not applicable HR—hazard ratio CI—confidence interval MGMT—O6-methylguanine DNA methyltransferase NS—not stated FOLFOX—5-Fluoruracil + oxaliplatin CAPOX—capecitabine + oxapliplatn STZ—streptozotocin 5-

FU—5- fluorouracil TemCap—tomozolomide and capecitabine 5-FU/DTIC—5- fluorouacil and dacarbazine CARC—carcinoid Tx—therapy NET—neuroendocrine tumour NEC—neuroendocrine carcinoma.

**Table S5.** Summary of studies exploring the role of immunotherapy.

| Study                         | Design                                                                                         | Treatment     | Pts selection<br>(Grade,<br>Prior Therapy,<br>ECOG PS)                                                                                                                                          | N                                                            | Primary<br>End<br>Point                                 | median PFS<br>(months)                                               | median OS<br>(months)                                                      | DoR<br>(months)                                                              | ORR<br>(%)   | DCR<br>(CR+PR+SD)<br>(%/n)                                      | G3–4 toxicity<br>(%) |
|-------------------------------|------------------------------------------------------------------------------------------------|---------------|-------------------------------------------------------------------------------------------------------------------------------------------------------------------------------------------------|--------------------------------------------------------------|---------------------------------------------------------|----------------------------------------------------------------------|----------------------------------------------------------------------------|------------------------------------------------------------------------------|--------------|-----------------------------------------------------------------|----------------------|
| KEYNOTE -028<br>[49]          | Phase Ib<br>multicohort<br>study                                                               | Pembrolizumab | G1/2<br>Advanced carcinoids or<br>pancreatic NET, progressive on<br>standard Tx, PD-L1–positive<br>(>1%)<br>ECOG PS 0–1                                                                         | 41 pts<br>PanNET = 16 pts                                    | ORR<br>per RECIST<br>v1.1 by<br>investigato<br>r review | PanNET = 4.5 m                                                       | PanNET = 21 m                                                              | PanNET<br>9.2 m<br>(for<br>responder<br>is ongoing<br>response of<br>17.6 m) | PanNET<br>6% | PanNET<br>94%<br>CR = 0<br>PR = 6% (n = 1)<br>SD = 88% (n = 14) | NS                   |
| KEYNOTE-158<br>study<br>[133] | A phase II<br>basket study<br>in selected<br>group of pts<br>with<br>advanced<br>solid tumours | Pembrolizumab | Well/moderately-<br>differentiated NET of the lung,<br>appendix, small intestine,<br>colon, rectum, or pancreas<br>Progression or intolerance<br>to ≥ 1 line of standard therapy<br>ECOG PS 0–1 | 1032 pts<br>NET = 107 pts<br>PanNET- number<br>not mentioned | ORR by<br>central<br>review                             | ALL 4.1 m<br>(95% CI 3.5–<br>5.4)<br><br>ALL 6 m PFS<br>rate -38.2%. | Not reached<br>(95% CI 18.8-not<br>reached)<br><br>6 m OS rate -<br>84.6%. | Not<br>Reached                                                               | ALL 3.7%     | CR = 0<br><br>PR = 4<br>(3 PanNET, 1<br>giNET)<br><br>SD = 61   | 20.6%                |

Table S5. Cont.

|                     |                                     |               |                                                                                                                           |                                                                                         |                             |    |    |    |                                                                    |                                                                                                                                                                                                  |                                                                                    |
|---------------------|-------------------------------------|---------------|---------------------------------------------------------------------------------------------------------------------------|-----------------------------------------------------------------------------------------|-----------------------------|----|----|----|--------------------------------------------------------------------|--------------------------------------------------------------------------------------------------------------------------------------------------------------------------------------------------|------------------------------------------------------------------------------------|
| NCT02955069<br>[50] | A phase 2,<br>multi-centre<br>study | Spartalizumab | well- & poorly-differentiated<br>Non-functional NEN,<br>progressed on prior Tx,<br>regardless of<br>PD-L1<br>ECOG PS - NS | 116 pts<br><br>PanNET = 33 pts<br>GI NET = 32 pts<br>T NET = 30 pts<br>GEP NEC = 21 pts | ORR by<br>central<br>review | NR | NA | NA | 7.4% in well-<br>diff NET<br><br>4.8% in<br>poorly-diff<br>GEP NEC | T NET 73.3% (PR =<br>20.0% + SD =<br>53.3% + Unknown<br>= 10.0%)<br>PanNET 57.6%<br>(PR = 3.0% + SD =<br>3% in PanNET 54.5% + Unknown<br>= 3.0%)                                                 | >= 2.5%<br>Abdominal pain;<br>Back pain;<br>Anaemia;<br>Dyspnoea;<br>Hypertension. |
|                     |                                     |               |                                                                                                                           |                                                                                         |                             |    |    |    |                                                                    | GI NET 59.4% (PR<br>= 0% + SD = 59.4%<br>+ Unknown =<br>6.3%)<br>ALL NET 63.2% (PR<br>= 7.4% + SD =<br>55.8% Unknown =<br>6.3%)<br>NEC 19.0%<br>(PR = 4.8% + SD =<br>14.3% + Unknown<br>= 14.3%) |                                                                                    |

N—number median PFS—median progression free survival median OS—overall survival DoR—duration of response ORR—objective response rate DCR—disease control rate CR—complete response  
PR—partial response SD—stable disease G—grade Tx—therapy pts—patients NS—not stated NA—not applicable NR—not reached PD L1—programme death ligand 1 T NET—thoracic  
neuroendocrine tumours GI NET—gastrointestinal neuroendocrine tumours NET—neuroendocrine tumour NEC—neuroendocrine carcinoma GEP NEC—gastro-entero-pancreatic neuroendocrine carcinoma.

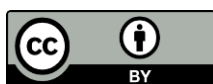

© 2020 by the authors. Licensee MDPI, Basel, Switzerland. This article is an open access article distributed under the terms and conditions of the Creative Commons Attribution (CC BY) license (<http://creativecommons.org/licenses/by/4.0/>).
